# Supplementary material for: Self-Assembled Hybrid ZnO Nanostructures as Supports for Copper-Based Catalysts in the Hydrogenolysis of Glycerol
Source: MDPI journal article supplement (doi:10.3390/catal11040516), 2021-04-20
Supplement: s1 [file s1]

## Supplementary Material

### ” Self-assembled hybrid ZnO nanostructures as supports for copper-based catalysts in the hydrogenolysis of glycerol ”

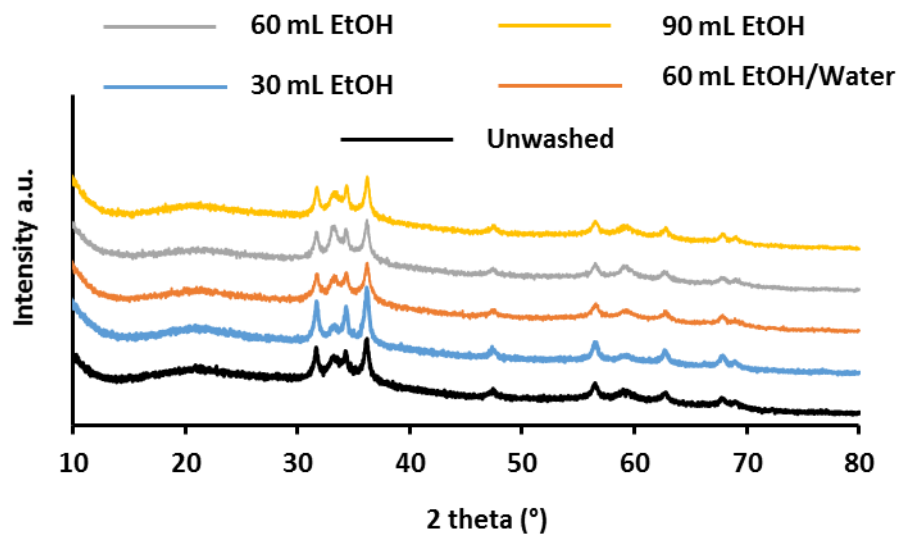

**Figure S1.** XRD patterns of ZnO/PAA2 using different washing

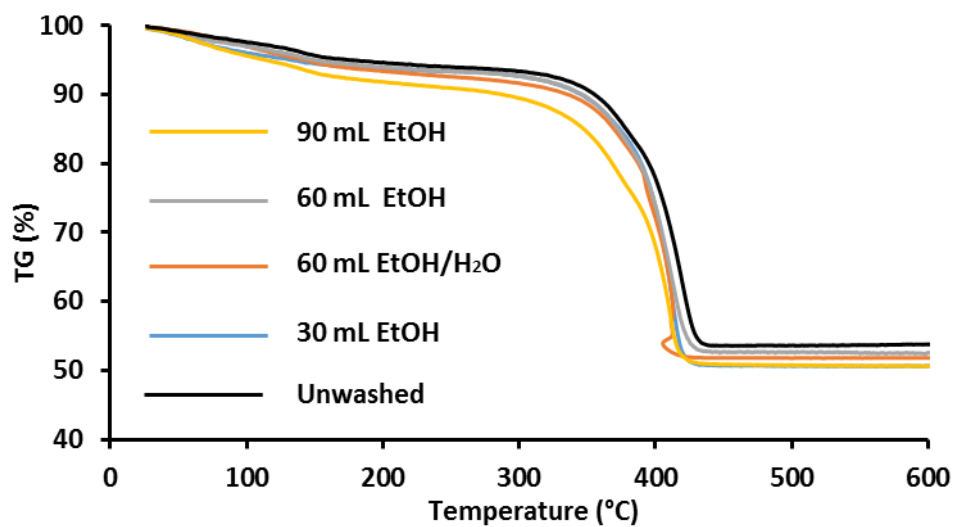

**Figure S2.** TGA curves of ZnO/PAA2 using different washing

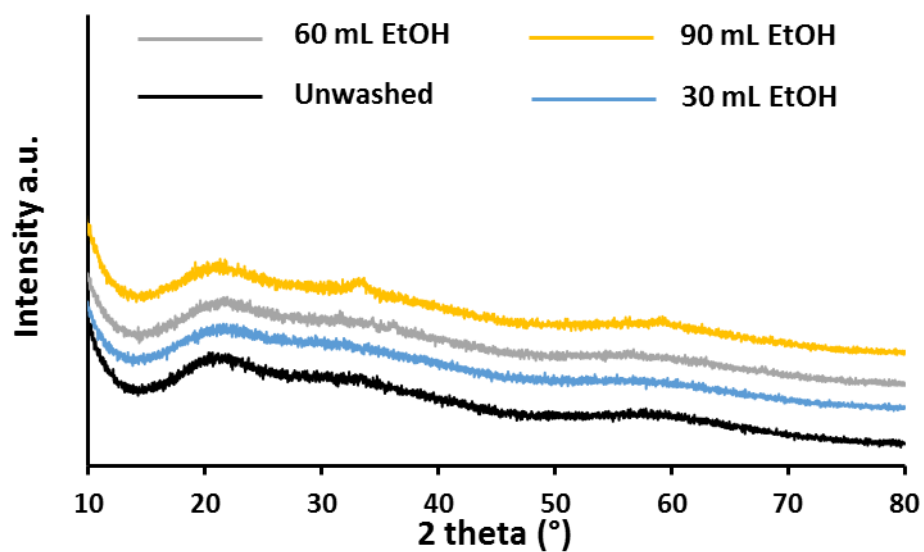

**Figure S3.** XRD diffraction patterns for ZnO/PAA5 washed with different volume of EtOH

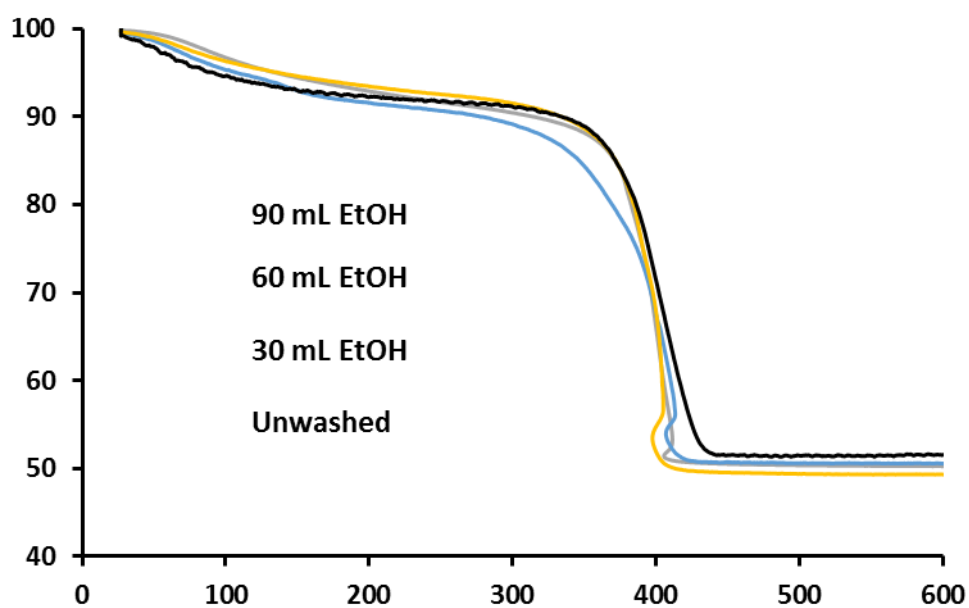

**Figure S4.** TGA curves for ZnO/PAA5 washed with different volume of EtOH

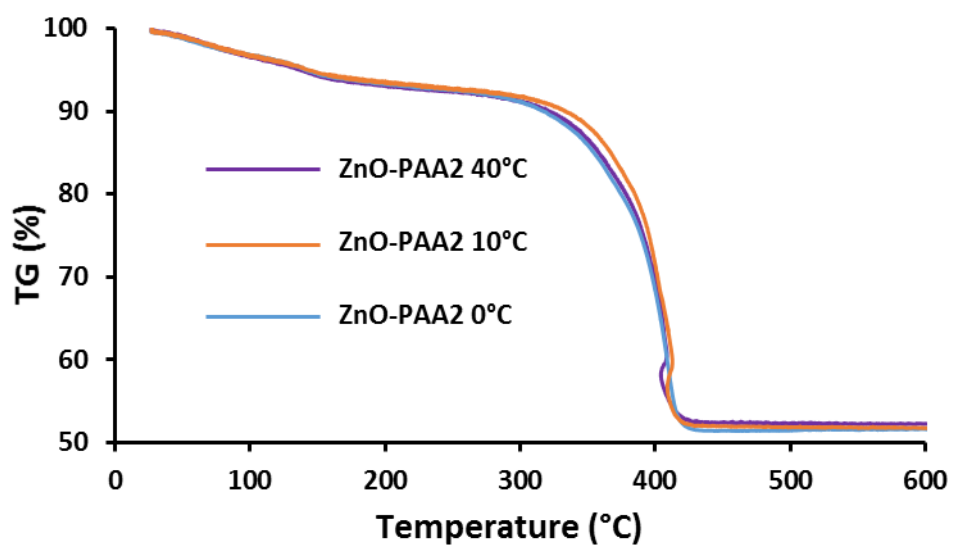

**Figure S5.** TGA curves for ZnO/PAA2 synthesized at different temperature

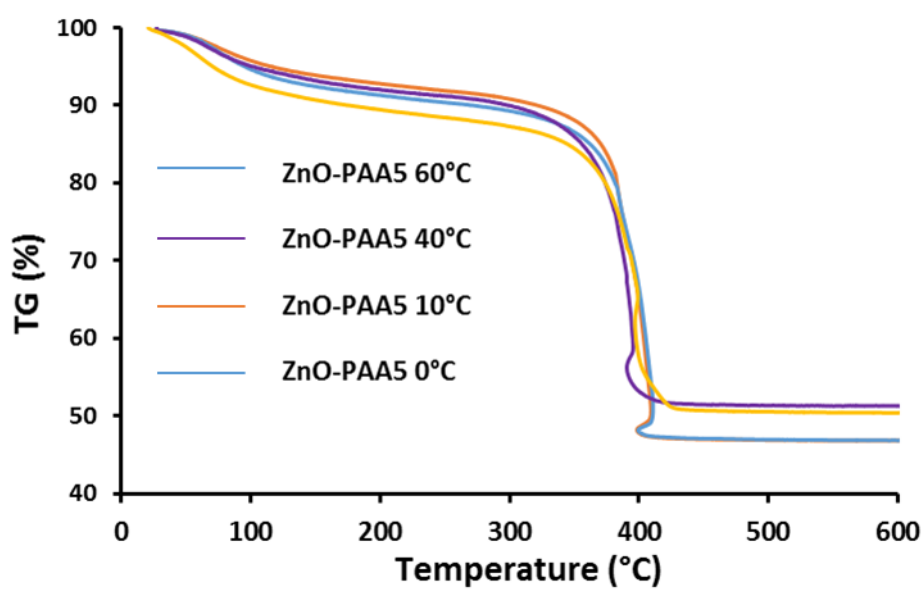

**Figure S6.** TGA curves of ZnO/PAA5 synthesized at different temperature

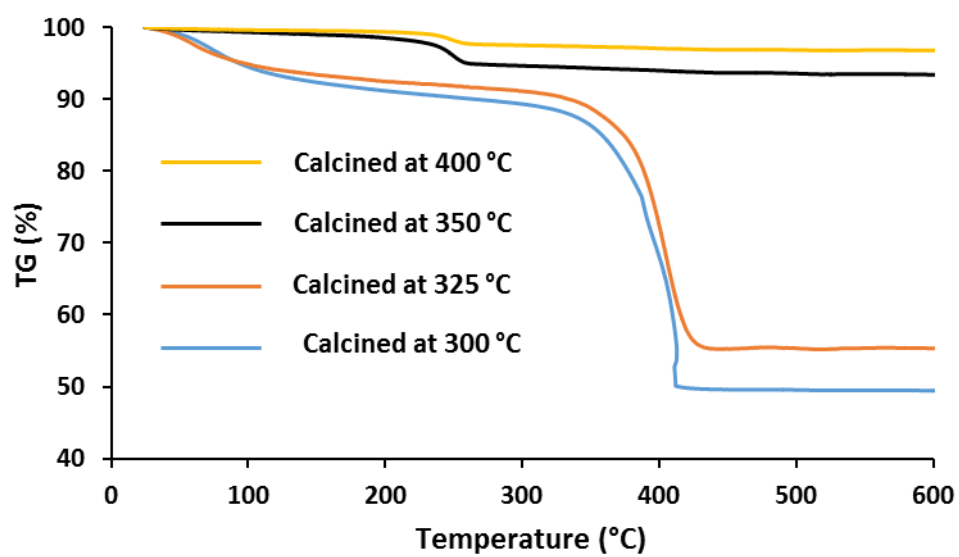

**Figure S7.** TGA curves for ZnO/PAA2 calcined at different temperatures

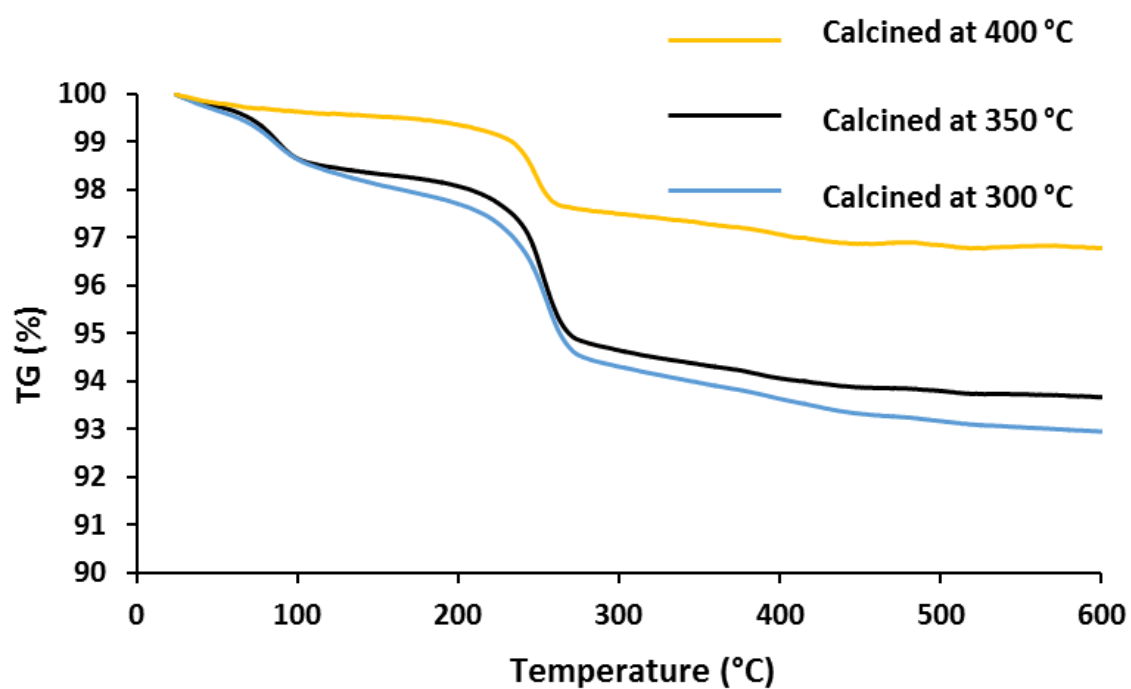

**Figure S8.** TGA curves for ZnO/PAA5 calcined at different temperatures

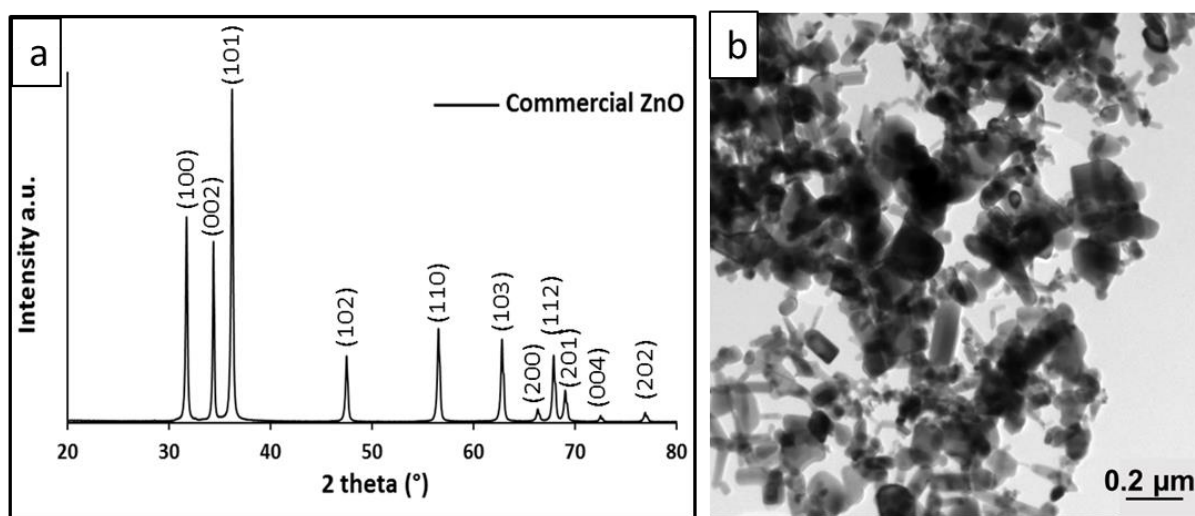

**Figure S9.** (a) XRD diffraction pattern and (b) TEM images of commercial ZnO

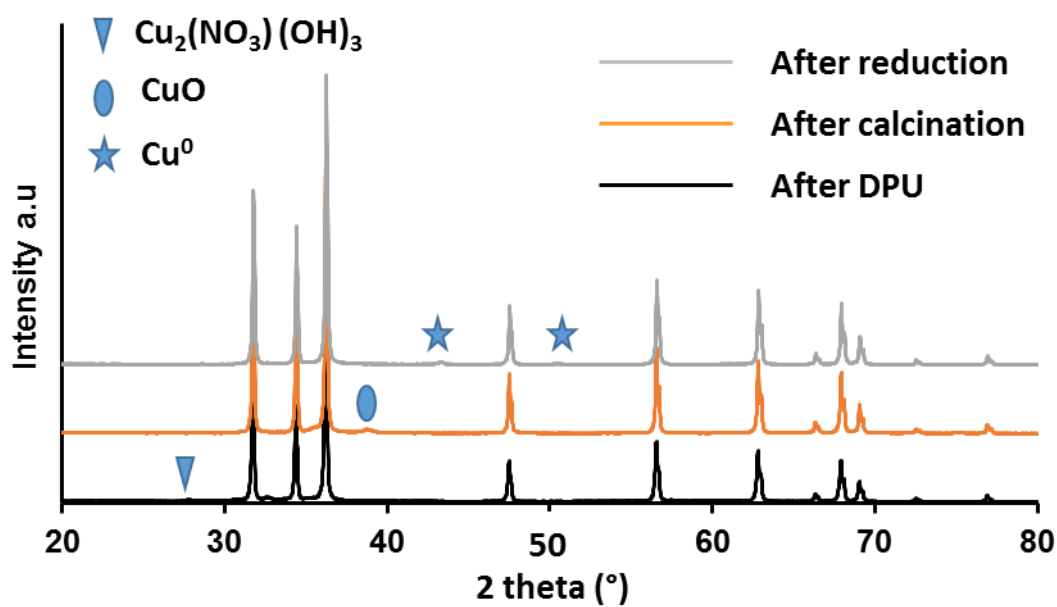

**Figure S10.** Representative XRD diffraction patterns of 5%Cu/ZnO<sub>20</sub> at different stage of the synthesis

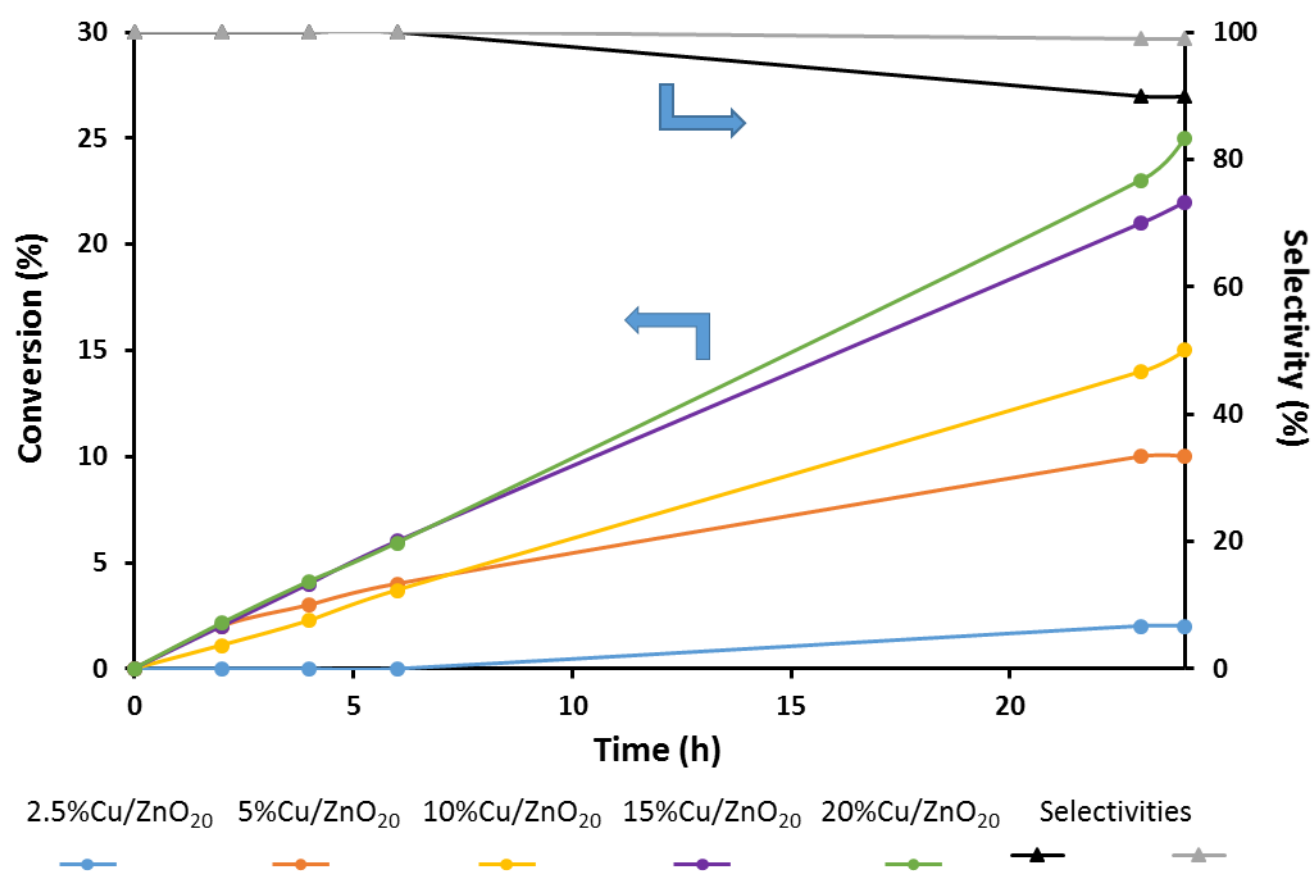

**Figure S11.** Conversion and selectivity in function of time for Cu supported on commercial ZnO with different copper weight percentage. Grey curve: selectivity for 2.5%Cu/ZnO<sub>20</sub>; black curve: selectivity for the other catalysts

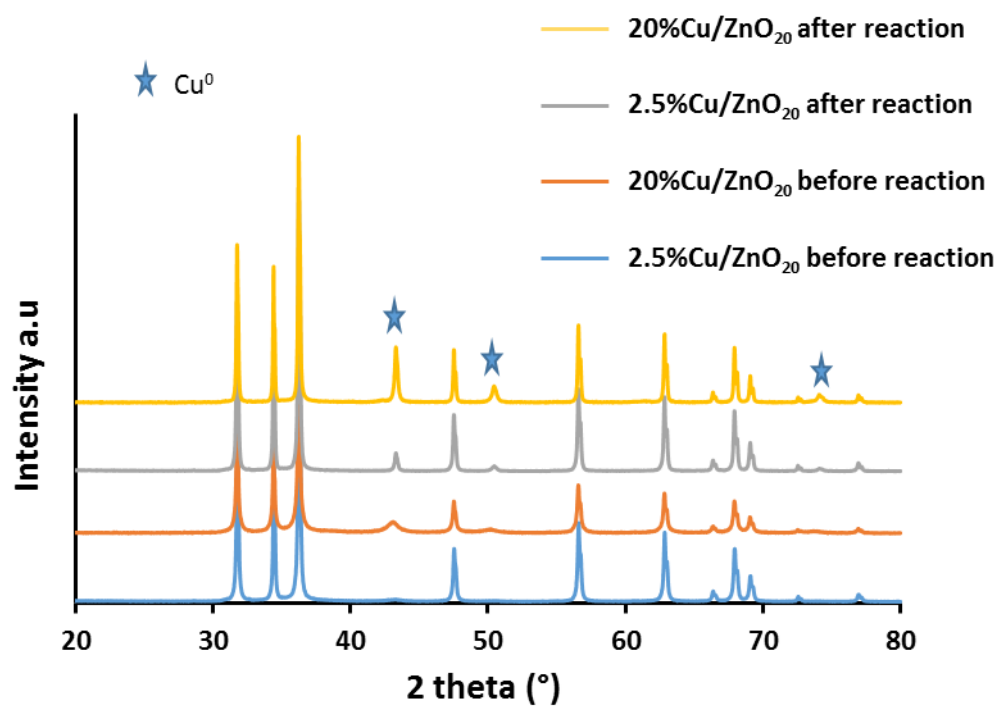

Figure S12. XRD patterns of 2.5%Cu/ZnO<sub>20</sub> and 20%Cu/ZnO<sub>20</sub> before and after reaction

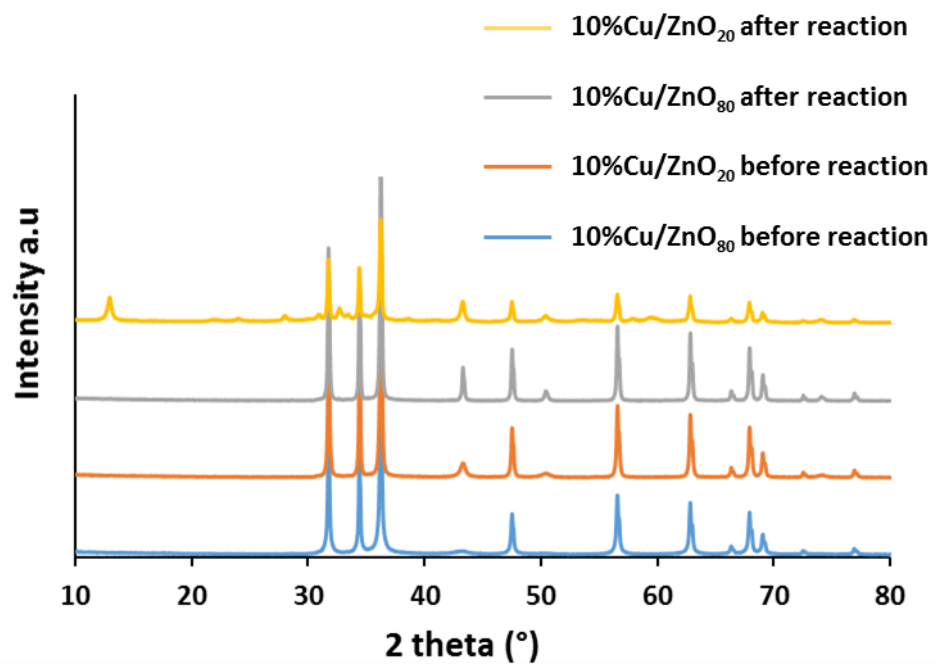

Figure S13. XRD patterns of 10%Cu/ZnO<sub>20</sub> and 10%Cu/ZnO<sub>80</sub> before and after reaction

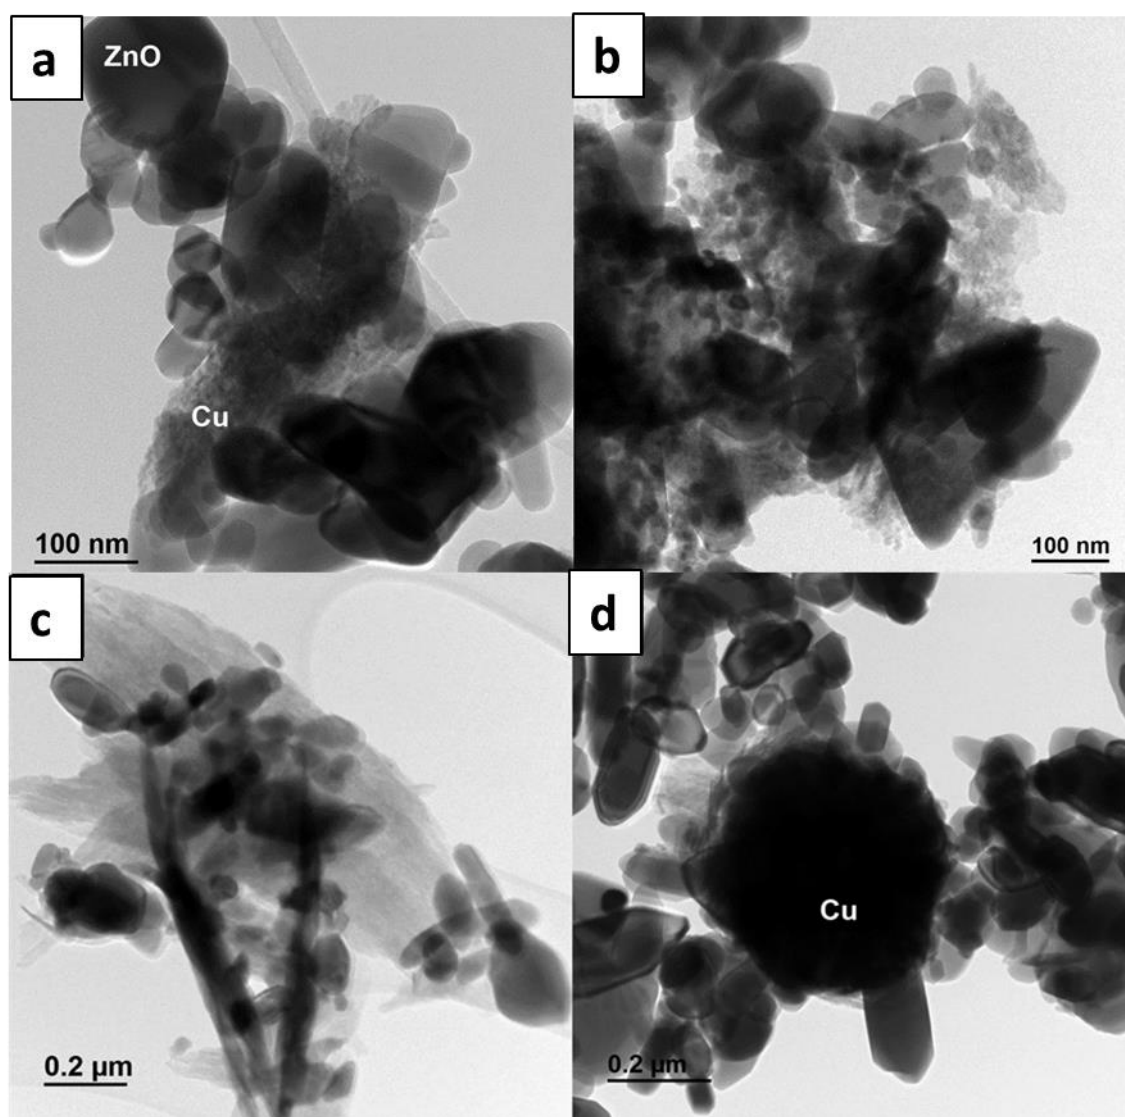

**Figure S14.** TEM images of 10%Cu/ZnO<sub>20</sub> (a, c) and 10%Cu/ZnO<sub>80</sub> (b, d) before (a, b) and after (b, d) reaction



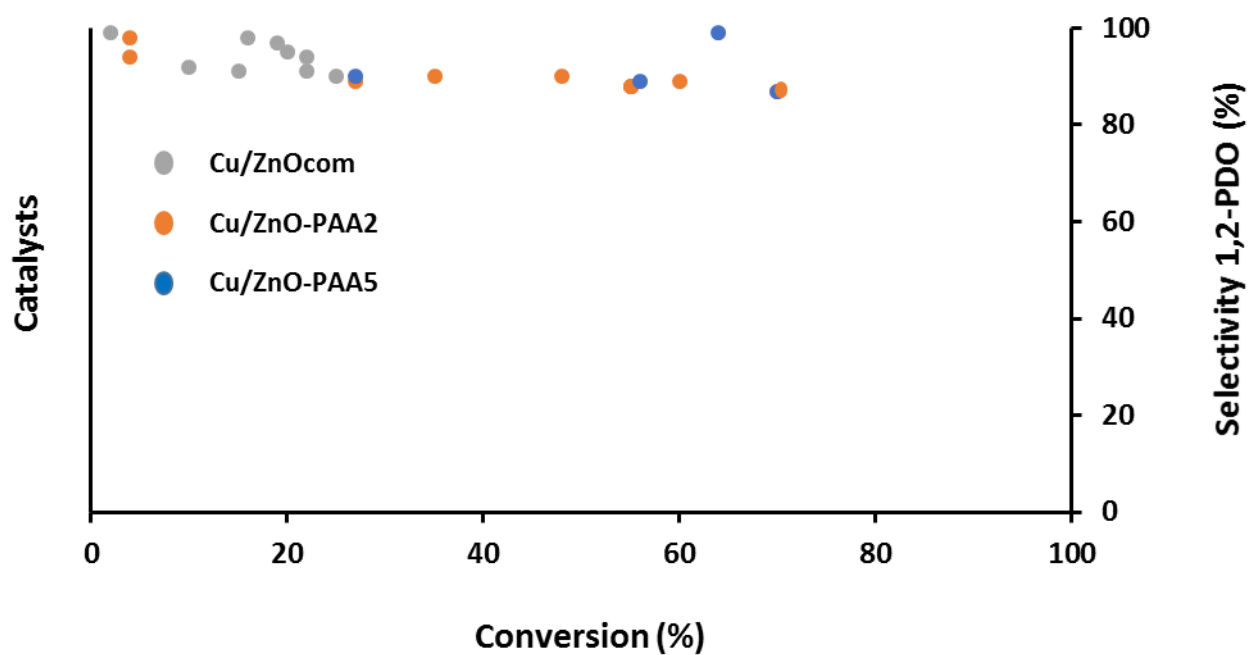

**Figure S15.** Selectivity towards 1,2-propanediol, in function of conversion.

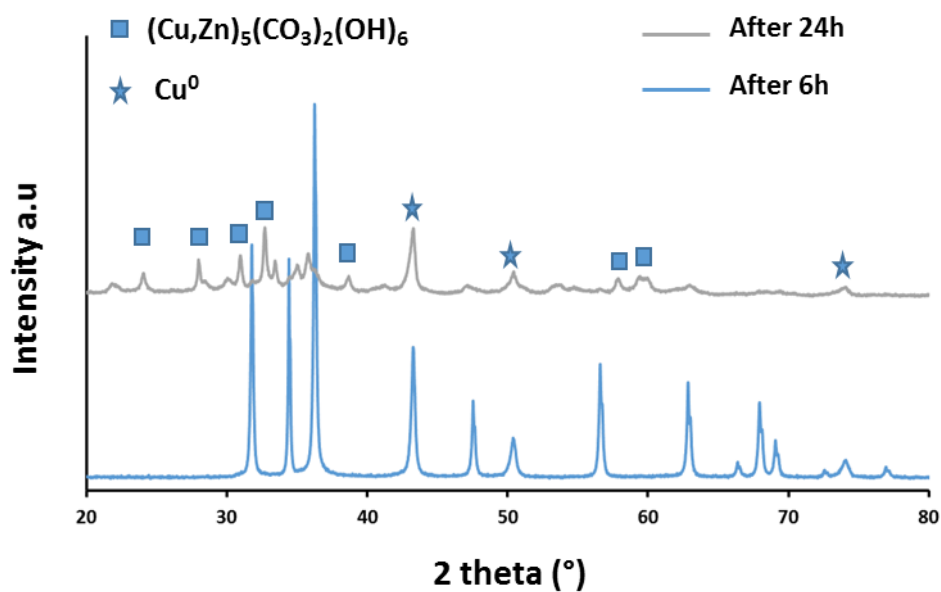

**Figure S16.** XRD patterns of the fresh 20%Cu/ZnO-PAA2<sub>0-NC</sub>, after 6 h and 24 h reaction

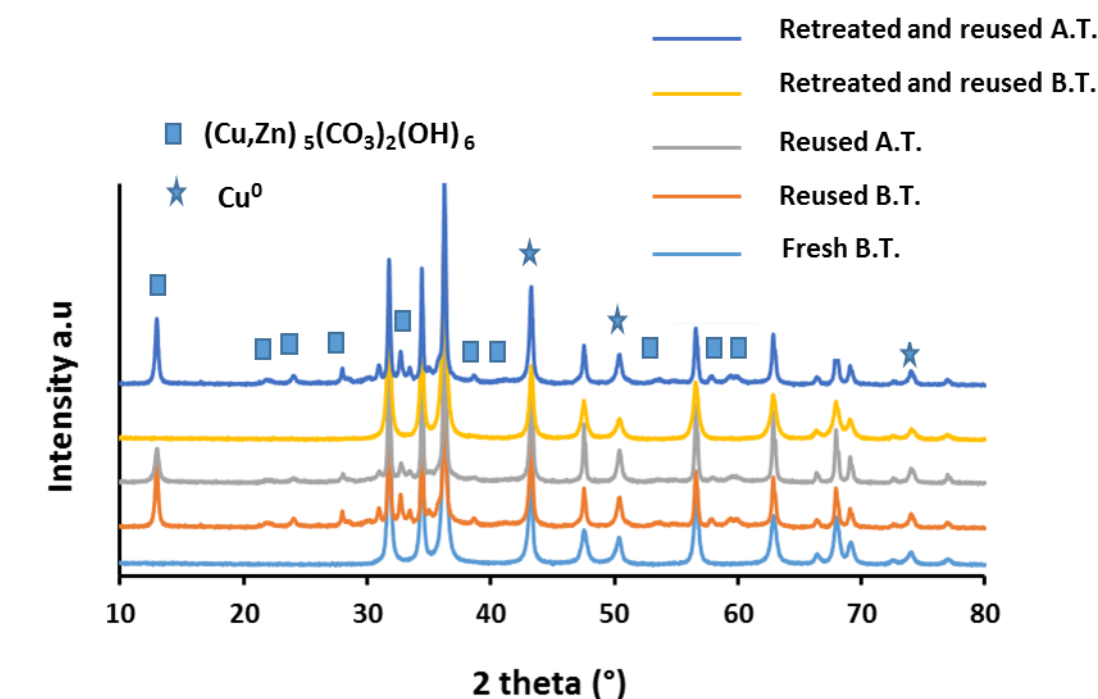

**Figure S17.** XRD patterns of the fresh and reused catalysts (20%Cu/ZnO-PAA2<sub>0-NC</sub>). (B.T. : before test and A.T. : after test)

**Table S1.** Cu/Zn molar ratios, amount of 1,2-PDO produced per mol of Cu and initial rates ( $V_0$ ) associated with Cu supported on commercial ZnO

| Entry | Catalysts <sup>a</sup>   | $n_{Cu}/n_{Zn}$ <sup>b</sup> | $R_{1,2-PDO}$<br>( $mol_{1,2-PDO} mol_{Cu}^{-1}$ ) <sup>c</sup> | $V_0$<br>( $mmol_{glycerol} mol_{Cu}^{-1} h^{-1}$ ) |
|-------|--------------------------|------------------------------|-----------------------------------------------------------------|-----------------------------------------------------|
| 1     | 2.5%Cu/ZnO <sub>20</sub> | 0.03                         | 2.2                                                             | 107                                                 |
| 2     | 5%Cu/ZnO <sub>20</sub>   | 0.07                         | 5.6                                                             | 231                                                 |
| 3     | 10%Cu/ZnO <sub>20</sub>  | <b>0.14</b>                  | <b>6.8</b>                                                      | <b>290</b>                                          |
| 4     | 15%Cu/ZnO <sub>20</sub>  | 0.24                         | 3.8                                                             | 165                                                 |
| 5     | 20%Cu/ZnO <sub>20</sub>  | 0.30                         | 2.1                                                             | 91                                                  |
| 6     | 10%Cu/ZnO <sub>5</sub>   | 0.16                         | 4.9                                                             | 208                                                 |
| 7     | 10%Cu/ZnO <sub>10</sub>  | 0.15                         | 5.4                                                             | 235                                                 |
| 8     | 10%Cu/ZnO <sub>40</sub>  | 0.15                         | 5.9                                                             | 259                                                 |
| 9     | 10%Cu/ZnO <sub>80</sub>  | 0.13                         | 5.0                                                             | 209                                                 |

<sup>a</sup> The first number refer to the Cu loading; the subscript refer to  $[Cu^{2+}]$  concentration

<sup>b</sup> Cu/ZnO molar ratio, based on ICP analysis

<sup>c</sup> Amount of 1,2-PDO produced per mol of Cu, in 24 h

**Table S2.** Cu/Zn molar ratios and amount of 1,2-PDO produced per mol of Cu associated with Cu/ZnO/PAAx

| Entry | Catalysts <sup>a</sup>            | $n_{\text{Cu}}/n_{\text{Zn}}$ <sup>b</sup> | $R_{1,2\text{-PDO}}$<br>( $\text{mol}_{1,2\text{ PDO}} \text{mol}_{\text{Cu}}^{-1}$ ) <sup>c</sup> |
|-------|-----------------------------------|--------------------------------------------|----------------------------------------------------------------------------------------------------|
| 1     | 5%Cu/ZnO/PAA2 <sub>0-NC</sub>     | 0.07                                       | 2.1                                                                                                |
| 2     | 10%Cu/ZnO/PAA2 <sub>0-NC</sub>    | 0.15                                       | 12.5                                                                                               |
| 3     | 20%Cu/ZnO/PAA2 <sub>0-NC</sub>    | 0.31                                       | 9.3                                                                                                |
| 5     | 40%Cu/ZnO/PAA2 <sub>0-NC</sub>    | 0.78                                       | 0.3                                                                                                |
| 6     | 20%Cu/ZnO/PAA2 <sub>10-NC</sub>   | 0.34                                       | 7.5                                                                                                |
| 7     | 20%Cu/ZnO/PAA2 <sub>20-NC</sub>   | 0.34                                       | 6.7                                                                                                |
| 8     | 20%Cu/ZnO/PAA2 <sub>40-NC</sub>   | 0.34                                       | 3.4                                                                                                |
| 9     | 20%Cu/ZnO/PAA5 <sub>0-NC</sub>    | 0.39                                       | 8.1                                                                                                |
| 10    | 20%Cu/ZnO/PAA5 <sub>20-NC</sub>   | 0.33                                       | 8.8                                                                                                |
| 11    | 20%Cu/ZnO/PAA5 <sub>40-NC</sub>   | 0.32                                       | 7.4                                                                                                |
| 12    | 20%Cu/ZnO/PAA2 <sub>20-C400</sub> | 0.36                                       | 6.5                                                                                                |
| 13    | 20%Cu/ZnO/PAA5 <sub>20-C300</sub> | 0.26                                       | 4.2                                                                                                |

<sup>a</sup> The first number refer to the Cu loading; the subscript refer to  $[\text{Cu}^{2+}]$  concentration

<sup>b</sup> Cu/ZnO molar ratio, based on ICP analysis

<sup>c</sup> Amount of 1,2-PDO produced per mol of Cu, in 24 h
